# Supplementary material for: Seasonal behaviour of tidal damping and residual water level slope in the Yangtze River estuary: identifying the critical position and river discharge for maximum tidal damping
Source: Copernicus journal article supplement (doi:10.5194/hess-2018-524), 2018-11-19
Supplement: Supplementary file 1 [file hess-2018-524-supplement.pdf]

1  
2  
3  
4  
5  
6  
7  
8  
9  
10  
11  
12  
13  
14  
15  
16  
17  
18  
19  
20  
21  
22  
23  
24  
25  
26  
27  
28  
29  
30  
31  
32  
33  
34  
35  
36  
37  
38  
39  
40

## Supplementary Materials

### *Hydrology and Earth System Sciences*

## **Seasonal behaviour of tidal damping and residual water level slope in the Yangtze River estuary: identifying the critical position and river discharge for maximum tidal damping**

**Huayang Cai<sup>1,2,5</sup>, Hubert H. G. Savenije<sup>3</sup>, Erwan Garel<sup>4</sup>, Xianyi Zhang<sup>1,2</sup>, Leicheng Guo<sup>5</sup>, Min Zhang<sup>6</sup>, Feng Liu<sup>1,2</sup>, and Qingshu Yang<sup>1,2</sup>**

<sup>1</sup>Institute of Estuarine and Coastal Research, School of Marine Engineering and Technology, Sun Yat-sen University, Guangzhou, China

<sup>2</sup>Guangdong Provincial Engineering Research Center of Coasts, Islands and Reefs, Guangzhou, China

<sup>3</sup>Water Resources Section, Delft University of Technology, Delft, the Netherlands

<sup>4</sup>Centre for Marine and Environmental Research (CIMA), University of Algarve, Portugal

<sup>5</sup>State Key Laboratory of Estuarine and Coastal Research, East China Normal University, Shanghai, China

<sup>6</sup>Shanghai Normal University, Department of Geography, Shanghai, China

*Correspondence to:* Feng Liu (liuf53@mail.sysu.edu.cn)

### **Contents**

1. Figures S1 to S4

### **Introduction**

Figures S1-S3 show the seasonal behavior of the velocity number  $\mu$ , the celerity number  $\lambda$  and the phase lag  $\varepsilon$  under a wide range of tidal and riverine forcing conditions in the Yangtze River estuary.

Figure S4 shows the seasonal behavior of the three components ( $S_t$ ,  $S_r$ ,  $S_{tr}$ ) that contribute to the development of the residual water level slope  $S$ .

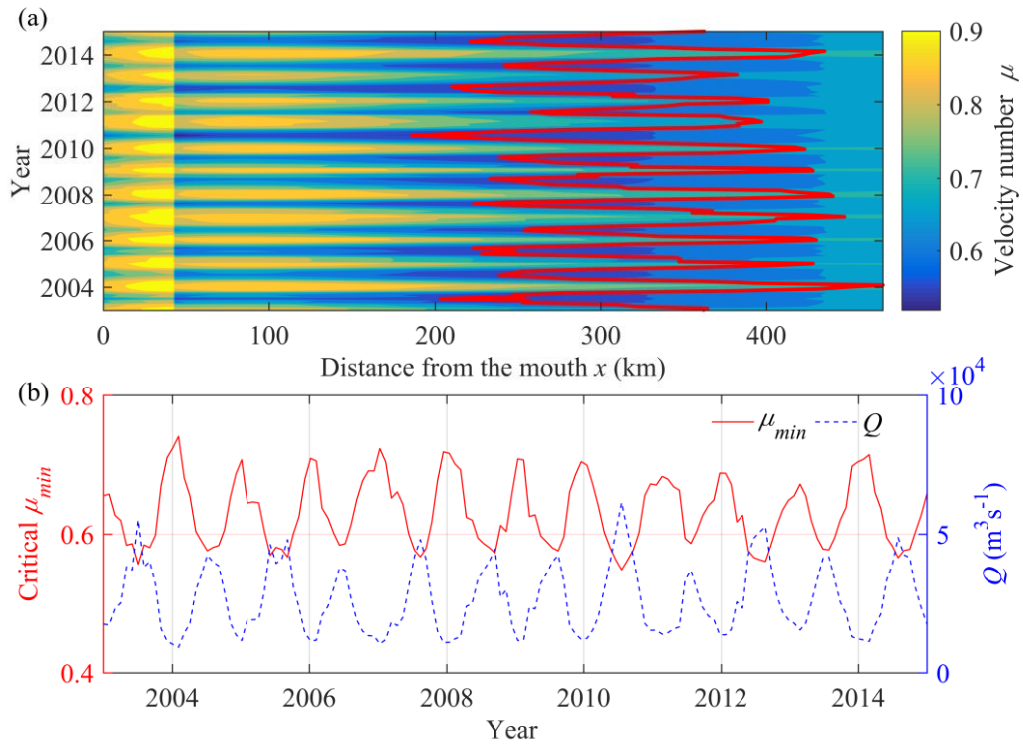

41

42 Figure S1. Contour plot of the velocity number  $\mu$  together with its minimum value  $\mu_{min}$  (indicated  
 43 by the red line) for each month (a) and the relation between the critical value and the river  
 44 discharge  $Q$  (b).

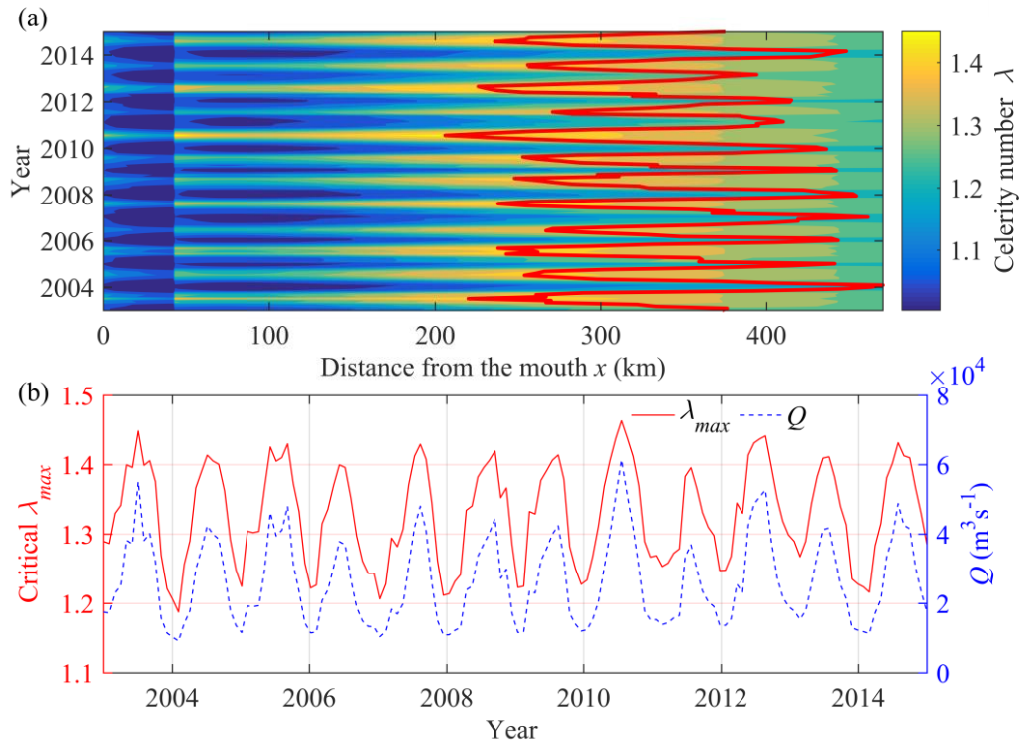

45

46 Figure S2. Contour plot of the celerity number  $\lambda$  together with its minimum value  $\lambda_{max}$  (indicated  
 47 by the red line) for each month (a) and the relation between the critical value and the river  
 48 discharge  $Q$  (b).

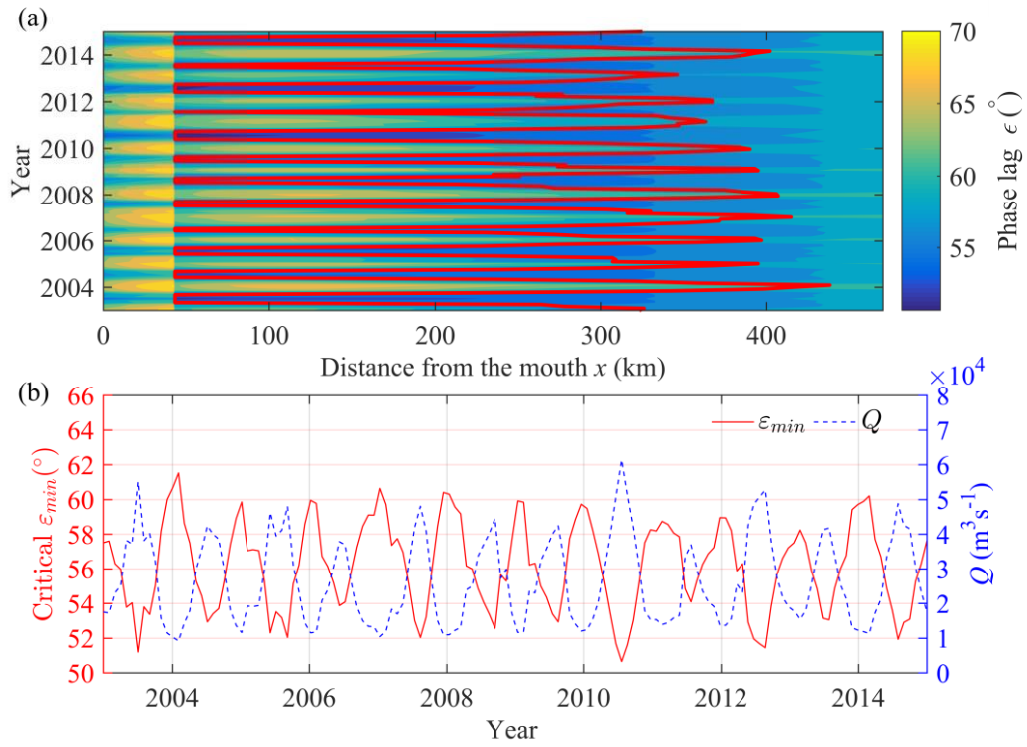

49

50 Figure S3. Contour plot of the phase lag  $\epsilon$  together with its minimum value  $\epsilon_{min}$  (indicated by the  
 51 red line) for each month (a) and the relation between the critical value and the river discharge  $Q$   
 52 (b).

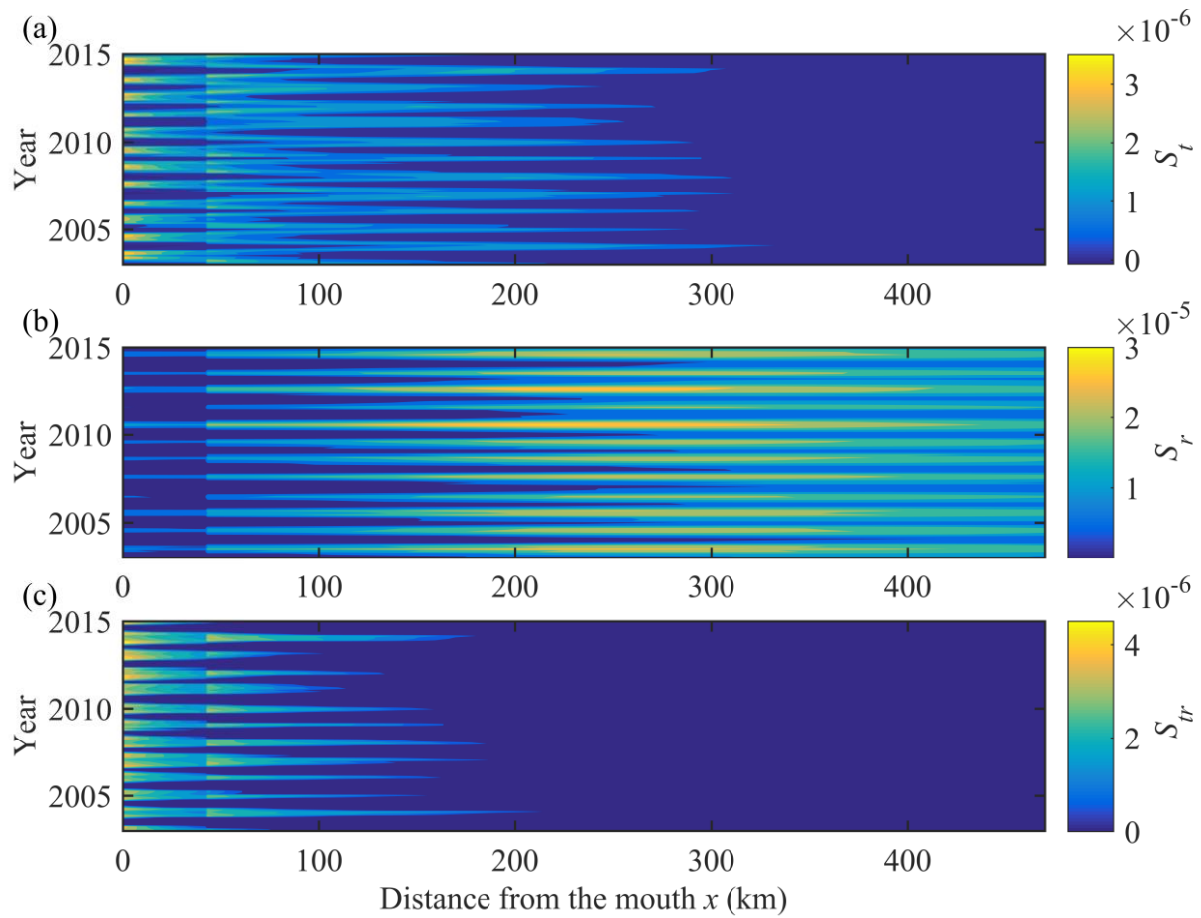

53

54 Figure S4. Contour plot of the three contributions made to the residual water level slope: tidal  
 55 component  $S_t$  (a), riverine component  $S_r$  (b), tide-river interaction component  $S_{tr}$  (c).

56

57
